# Supplementary material for: Biotechnological and Ecological Potential of Micromonospora provocatoris sp. nov., a Gifted Strain Isolated from the Challenger Deep of the Mariana Trench
Source: MDPI journal article supplement (doi:10.3390/md19050243), 2021-04-25
Supplement: s1 [file s1]

# Biotechnological and Ecological Potential of *Micromonospora provoctaris* sp. nov., a Gifted Strain Isolated from the Challenger Deep of the Mariana Trench

Wael M. Abdel-Mageed <sup>1,2</sup>, Lamya H. Al-Wahaibi <sup>3</sup>, Burhan Lehri <sup>4</sup>, Muneera S. M. Al-Saleem <sup>3</sup>, Michael Goodfellow <sup>5</sup>, Ali B. Kusuma <sup>5</sup>, Imen Nouioui <sup>5,7</sup>, Hariadi Soleh <sup>5,8</sup>, Wasu Pathom-Aree <sup>5</sup>, Marcel Jaspars <sup>6</sup> and Andrey V. Karlyshev <sup>4,\*</sup>

<sup>1</sup> Department of Pharmacognosy, College of Pharmacy, King Saud University, P.O. Box 2457, Riyadh 11451, Saudi Arabia

<sup>2</sup> Department of Pharmacognosy, Faculty of Pharmacy, Assiut University, Assiut 71526, Egypt

<sup>3</sup> Department of Chemistry, Science College, Princess Nourah Bint Abdulrahman University, Riyadh 11671, Saudi Arabia

<sup>4</sup> School of Life Sciences Pharmacy and Chemistry, Faculty of Science, Engineering and Computing, Kingston University London, Kingston upon Thames, Penrhyn Road, KT1 2EE, UK

<sup>5</sup> School of Natural and Environmental Sciences, Newcastle University, Newcastle upon Tyne, NE1 7RU, UK

<sup>6</sup> Marine Biodiscovery Centre, Department of Chemistry, University of Aberdeen, Old Aberdeen, Scotland, AB24 3UE, UK

<sup>7</sup> Indonesian Centre for Extremophile Bioresources and Biotechnology (ICEBB), Faculty of Biotechnology, Sumbawa University of Technology, Sumbawa Besar, 84371, Indonesia

<sup>8</sup> Leibniz-Institut DSMZ – German Collection of Microorganisms and Cell Cultures, Inhoffenstraße 7B, 38124 Braunschweig, Germany

\* Corresponding author.

E-mail address: [A.Karlyshev@kingston.ac.uk](mailto:A.Karlyshev@kingston.ac.uk) (Andrey V. Karlyshev)

## Abstract

A *Micromonospora* strain, isolate MT25<sup>T</sup>, was recovered from a sediment collected from the Challenger Deep of the Mariana Trench using a selective isolation procedure. The isolate produced two major metabolites, *n*-acetylglutaminyl glutamine amide and desferrioxamine B, the chemical structures of which were determined using 1D and 2D-NMR, including <sup>1</sup>H-<sup>15</sup>N HSQC and <sup>1</sup>H-<sup>15</sup>N HMBC 2D-NMR, as well as high resolution MS. A whole genome sequence of the strain showed the presence of ten natural product-biosynthetic gene clusters, including one responsible for the biosynthesis of desferrioxamine B. Whilst 16S rRNA gene sequence analyses showed that the isolate was most closely related to the type strain of *Micromonospora chalybeata*, a whole genome sequence analysis revealed it to be most closely related to *Micromonospora tulbaghiae* 45142<sup>T</sup>. The two strains were distinguished using a combination of genomic and phenotypic features. Based on these data, it is proposed that strain MT25<sup>T</sup> (NCIMB 15245<sup>T</sup>, TISTR 2834<sup>T</sup>) be classified as *Micromonospora provocatoris* sp. nov. Analysis of the genome sequence of strain MT25<sup>T</sup> (genome size 6.1 Mbp) revealed genes predicted to responsible for its adaptation to extreme environmental conditions that prevail in deep-sea sediments.

## Keywords

Mariana Trench; *Micromonospora provocatoris* MT25; desferrioxamine; *n*-acetylglutaminyl glutamine amide; <sup>1</sup>H-<sup>15</sup>N 2D-NMR; genomics; biosynthetic gene clusters; stress genes

| Content                                                                                                                           | Page |
|-----------------------------------------------------------------------------------------------------------------------------------|------|
| <b>Figure S1.</b> Photograph of <i>Micromonospora provoctaris</i> MT25 <sup>T</sup>                                               | 04   |
| <b>Figure S2.</b> Polar lipid patterns of <i>Micromonospora provoctaris</i> MT25 <sup>T</sup>                                     | 04   |
| <b>TABLE S1.</b> 1D and 2D NMR data for compound <b>1</b> obtained at 600 MHz in DMSO- <i>d</i> <sub>6</sub>                      | 05   |
| <b>Figure S3.</b> <sup>1</sup> H NMR spectrum of compound ( <b>1</b> ) (600 MHz, DMSO- <i>d</i> <sub>6</sub> )                    | 06   |
| <b>Figure S4.</b> <sup>13</sup> C NMR spectrum of compound ( <b>1</b> ) (150 MHz, DMSO- <i>d</i> <sub>6</sub> )                   | 06   |
| <b>Figure S5.</b> <sup>1</sup> H- <sup>13</sup> C HSQC spectrum of compound ( <b>1</b> ) (600 MHz, DMSO- <i>d</i> <sub>6</sub> )  | 07   |
| <b>Figure S6.</b> <sup>1</sup> H- <sup>1</sup> H COSY spectrum of compound ( <b>1</b> ) (600 MHz, DMSO- <i>d</i> <sub>6</sub> )   | 07   |
| <b>Figure S7.</b> <sup>1</sup> H- <sup>13</sup> C HMBC spectrum of compound ( <b>1</b> ) (600 MHz, DMSO- <i>d</i> <sub>6</sub> )  | 08   |
| <b>Figure S8.</b> <sup>1</sup> H- <sup>15</sup> N HSQC spectrum of compound ( <b>1</b> ) (600 MHz, DMSO- <i>d</i> <sub>6</sub> )  | 08   |
| <b>Figure S9.</b> <sup>1</sup> H- <sup>15</sup> N HMBC spectrum of compound ( <b>1</b> ) (600 MHz, DMSO- <i>d</i> <sub>6</sub> )  | 09   |
| <b>Figure S10.</b> LRESIMS spectrum of compound ( <b>1</b> ) (in Methanol)                                                        | 09   |
| <b>Figure S11.</b> HRESIMS spectrum of compound ( <b>1</b> ) (in Methanol)                                                        | 10   |
| <b>Table S2.</b> 1D and 2D NMR data for compound ( <b>2</b> ) obtained at 600 MHz in DMSO- <i>d</i> <sub>6</sub>                  | 11   |
| <b>Figure S12.</b> <sup>1</sup> H NMR spectrum of compound ( <b>2</b> ) (600 MHz, D <sub>2</sub> O)                               | 12   |
| <b>Figure S13.</b> <sup>13</sup> C NMR spectrum of compound ( <b>2</b> ) (150 MHz, D <sub>2</sub> O)                              | 12   |
| <b>Figure S14.</b> <sup>1</sup> H- <sup>1</sup> H COSY spectrum of compound ( <b>2</b> ) (600 MHz, D <sub>2</sub> O)              | 13   |
| <b>Figure S15.</b> <sup>1</sup> H- <sup>13</sup> C HMBC spectrum of compound ( <b>2</b> ) (600 MHz, D <sub>2</sub> O)             | 13   |
| <b>Figure S16.</b> <sup>1</sup> H NMR spectrum of compound ( <b>2</b> ) (600 MHz, DMSO- <i>d</i> <sub>6</sub> )                   | 14   |
| <b>Figure S17.</b> <sup>13</sup> C NMR spectrum of compound ( <b>2</b> ) (150 MHz, DMSO- <i>d</i> <sub>6</sub> )                  | 14   |
| <b>Figure S18.</b> <sup>1</sup> H- <sup>13</sup> C HSQC spectrum of compound ( <b>2</b> ) (600 MHz, DMSO- <i>d</i> <sub>6</sub> ) | 15   |
| <b>Figure S19.</b> <sup>1</sup> H- <sup>1</sup> H COSY spectrum of compound ( <b>2</b> ) (600 MHz, DMSO- <i>d</i> <sub>6</sub> )  | 15   |
| <b>Figure S20.</b> <sup>1</sup> H- <sup>13</sup> C HMBC spectrum of compound ( <b>2</b> ) (600 MHz, DMSO- <i>d</i> <sub>6</sub> ) | 16   |
| <b>Figure S21.</b> <sup>1</sup> H- <sup>15</sup> N HMBC spectrum of compound ( <b>2</b> ) (600 MHz, DMSO- <i>d</i> <sub>6</sub> ) | 16   |
| <b>Figure S22.</b> HSQC-TOCSY spectrum of compound ( <b>2</b> ) (600 MHz, DMSO- <i>d</i> <sub>6</sub> )                           | 17   |
| <b>Figure S23.</b> 1,1-ADEQUATE spectrum of compound ( <b>2</b> ) (600 MHz, DMSO- <i>d</i> <sub>6</sub> )                         | 17   |
| <b>Figure S24.</b> LRESIMS spectrum of compound ( <b>2</b> ) (in Methanol)                                                        | 18   |
| <b>Figure S25.</b> HRESIMS spectrum of compound ( <b>2</b> ) (in Methanol)                                                        | 18   |
| <b>Table S3.</b> Some putative stress response genes identified in the genome of <i>M. provoctaris</i> MT25.                      | 19   |

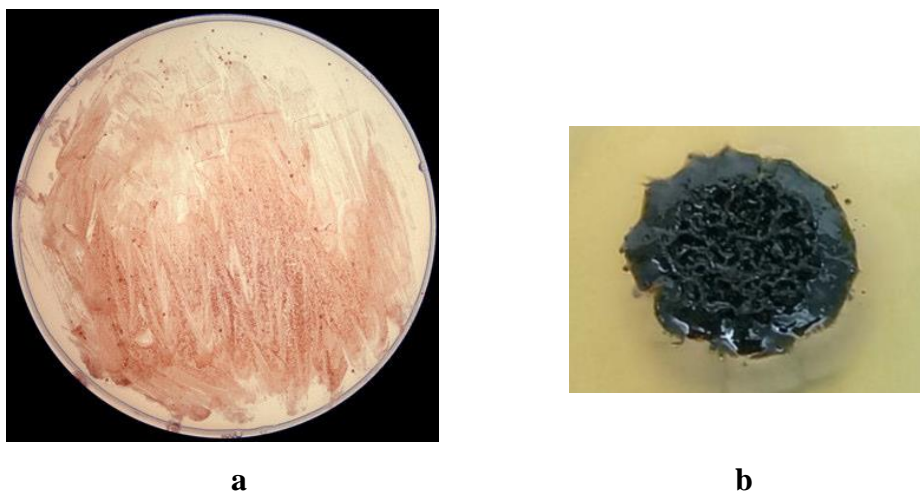

**Figure S1.** (a) Substrate mycelium of *Micromonospora provoctaris* MT25<sup>T</sup> growing on oatmeal agar after two weeks at 28 °C and (b) a colony of the strain after prolonged inoculation showing black mucilagenous spores

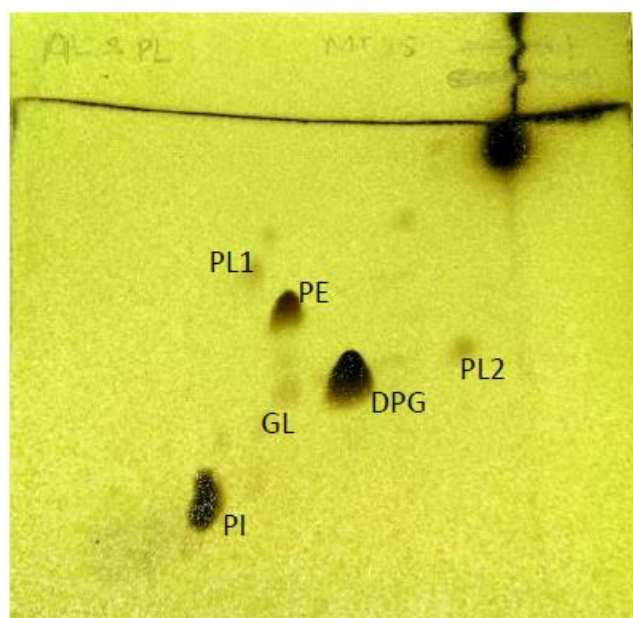

**Figure S2.** Polar lipid patterns of *Micromonospora provoctaris* MT25<sup>T</sup> containing diphosphatidylglycerol (DPG), phosphatidylethanolamine (diagnostic lipid) (PE) and phosphatidylinositol (PI)., these lipids were identified by comparing their mobilities with those of lipid standards (PH-9; Sigma). Solvent 1: chloroform: methanol: distilled water (65:25:4 v/v); Solvent 2: chloroform: glacial acetic acid: methanol: distilled water (80:12:15:4 v/v). The solvent 1 was used for the first chromatographic run where the TLC plate was set up in perpendicular position towards the solvent direction., whilst the solvent 2 was involved in second run where the position of the TLC plate and solvent are in the same direction.

**TABLE S1.** 1D and 2D NMR data for compound **1** obtained at 600 MHz in DMSO-*d*<sub>6</sub>

| No.                 | $\delta_c$ /ppm mult | $\delta_N$ /ppm mult | $\delta_H$ /ppm mult                     | $^1\text{H}$ - $^1\text{H}$ COSY<br>H $\longrightarrow$ H | $^1\text{H}$ - $^{13}\text{C}$ HMBC<br>H $\longrightarrow$ C | $^1\text{H}$ - $^{15}\text{N}$ HMBC<br>H $\longrightarrow$ N |
|---------------------|----------------------|----------------------|------------------------------------------|-----------------------------------------------------------|--------------------------------------------------------------|--------------------------------------------------------------|
| NH <sub>2</sub> -1  | -                    | 108.5 t              | <b>a</b> 7.28 br s<br><b>b</b> 6.75 brs  |                                                           |                                                              |                                                              |
| 2                   | 173.8 s              | -                    |                                          |                                                           | H-3, NH <sub>2</sub> -1                                      |                                                              |
| 3                   | 31.4 t               | -                    | 2.06 m                                   | H-4a/b                                                    | H-4a/b, NH <sub>2</sub> -1                                   |                                                              |
| 4                   | 27.7 t               | -                    | <b>a</b> 1.89 m<br><b>b</b> 1.74 m       | H-3, H-5                                                  | H-3, NH-13                                                   |                                                              |
| 5                   | 52.7 d               | -                    | 4.15 m                                   | H-4a/b,<br>NH-13                                          | H-3, H-4a/b,<br>NH-13                                        |                                                              |
| 6                   | 171.4 s              | -                    |                                          |                                                           | H-5, NH-7                                                    |                                                              |
| NH-7                |                      | 117.3 d              | 7.97 d, 7.8                              | H-8                                                       |                                                              | H-8, H-9a/b                                                  |
| 8                   | 52.1 d               | -                    | 4.12 m                                   | H-9a/b, NH-7                                              | H-9a/b, H-10,<br>NH-7, NH <sub>2</sub> -17                   |                                                              |
| 9                   | 27.8 t               | -                    | <b>a</b> 1.87 m<br><b>b</b> 1.67 m       | H-8, H-10                                                 | H-10, NH-7                                                   |                                                              |
| 10                  | 31.6 t               | -                    | 2.08 m                                   | H-9a/b                                                    | H-9a/b, NH <sub>2</sub> -12                                  |                                                              |
| 11                  | 173.8 s              | -                    |                                          |                                                           | H-10, NH <sub>2</sub> -12                                    |                                                              |
| NH <sub>2</sub> -12 |                      | 108.6 t              | <b>a</b> 7.28 br s<br><b>b</b> 6.75 br s |                                                           |                                                              |                                                              |
| NH-13               |                      | 123.2 d              | 8.11 d, 7.8                              | H-5                                                       |                                                              | H-4a/b, H-5,<br>H-15                                         |
| 14                  | 169.7 s              | -                    |                                          |                                                           | H-5, H-15, NH-<br>13                                         |                                                              |
| 15                  | 22.6 q               | -                    | 1.86 s                                   |                                                           |                                                              |                                                              |
| 16                  | 173.3 s              | -                    |                                          |                                                           | H-8, H-9a/b,<br>NH <sub>2</sub> -17                          |                                                              |
| NH <sub>2</sub> -17 |                      | 104.8 t              | <b>a</b> 7.27 br s<br><b>b</b> 7.05 br s |                                                           |                                                              |                                                              |

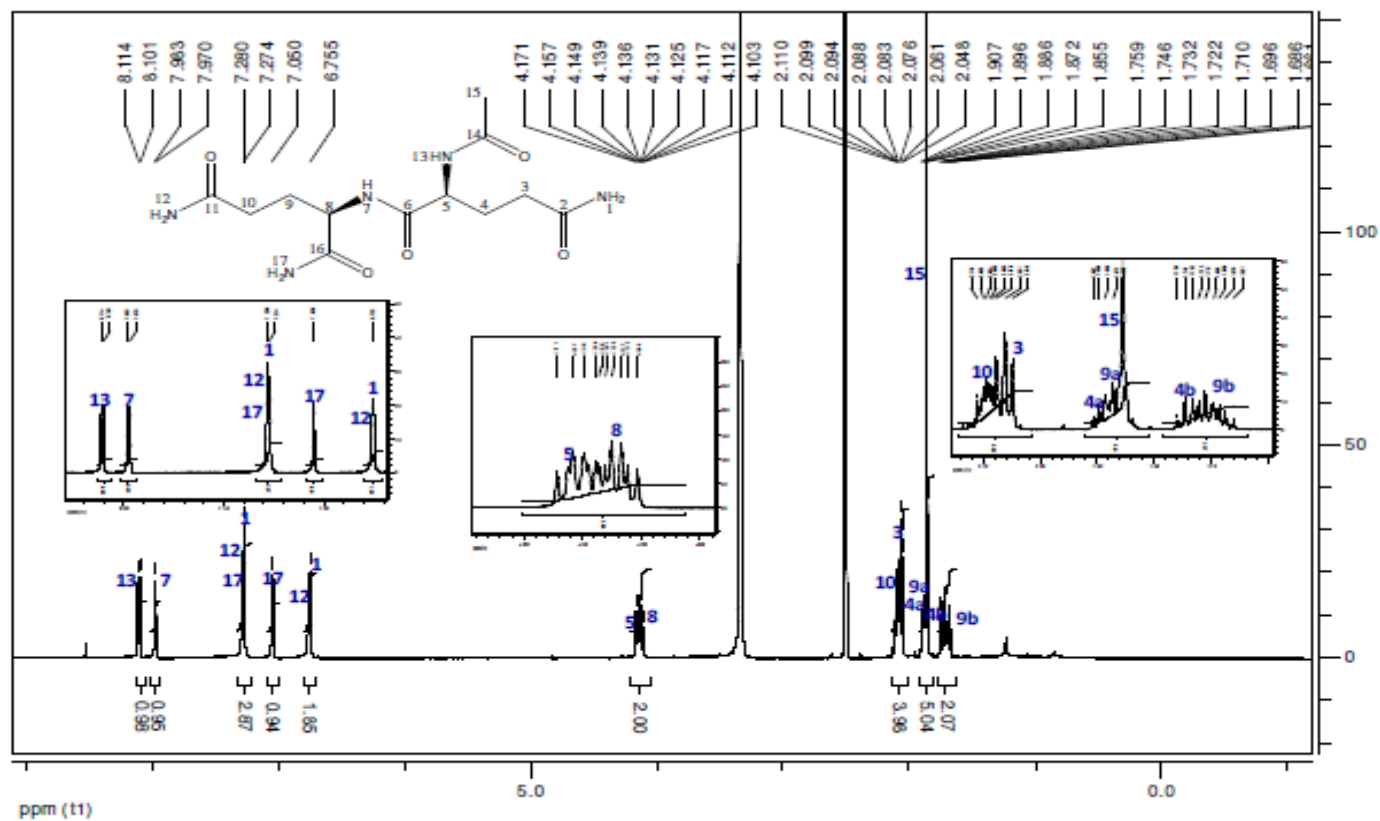

**Figure S3.**  $^1\text{H}$  NMR spectrum of compound (1) (600 MHz,  $\text{DMSO}-d_6$ )

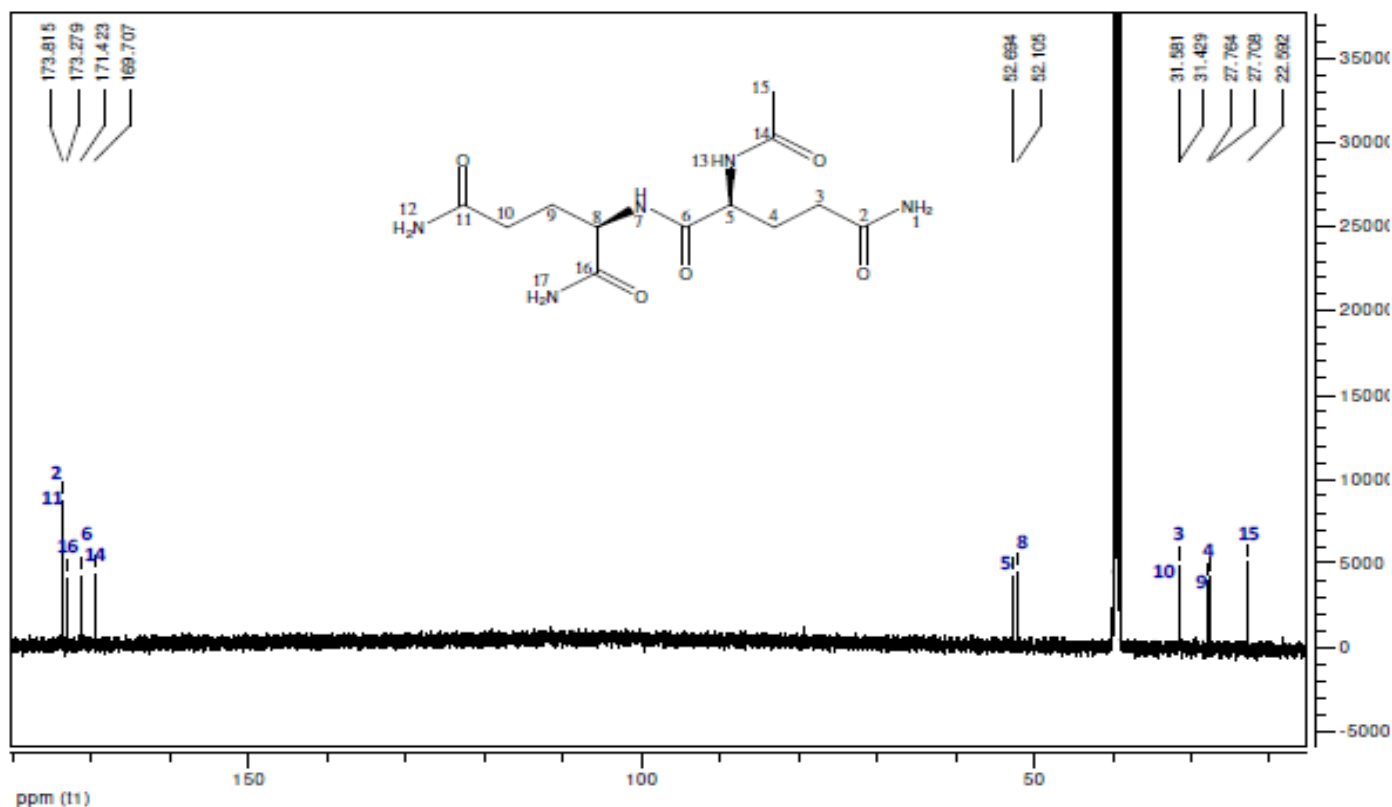

**Figure S4.**  $^{13}\text{C}$  NMR spectrum of compound (1) (150 MHz,  $\text{DMSO}-d_6$ )

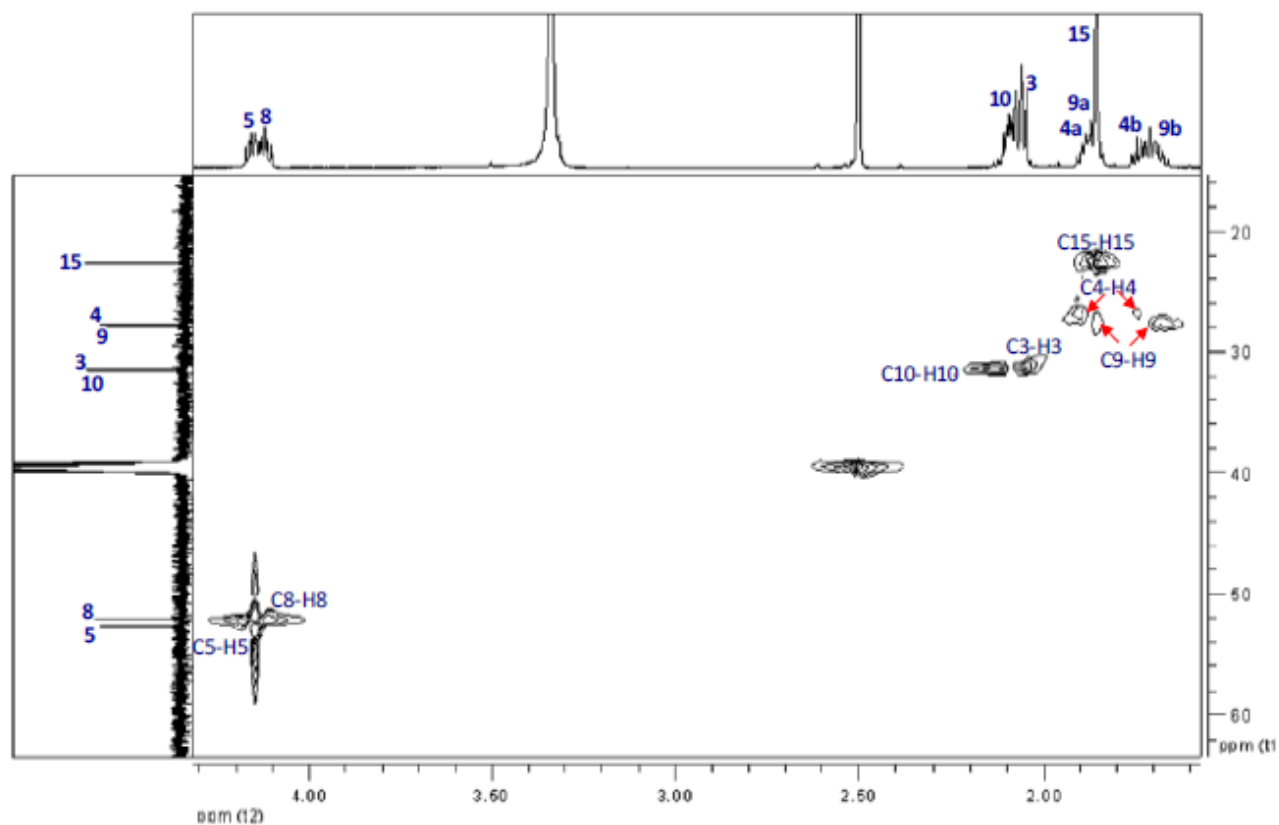

**Figure S5.**  $^1\text{H}$ - $^{13}\text{C}$  HSQC spectrum of compound (**1**) (600 MHz,  $\text{DMSO-}d_6$ )

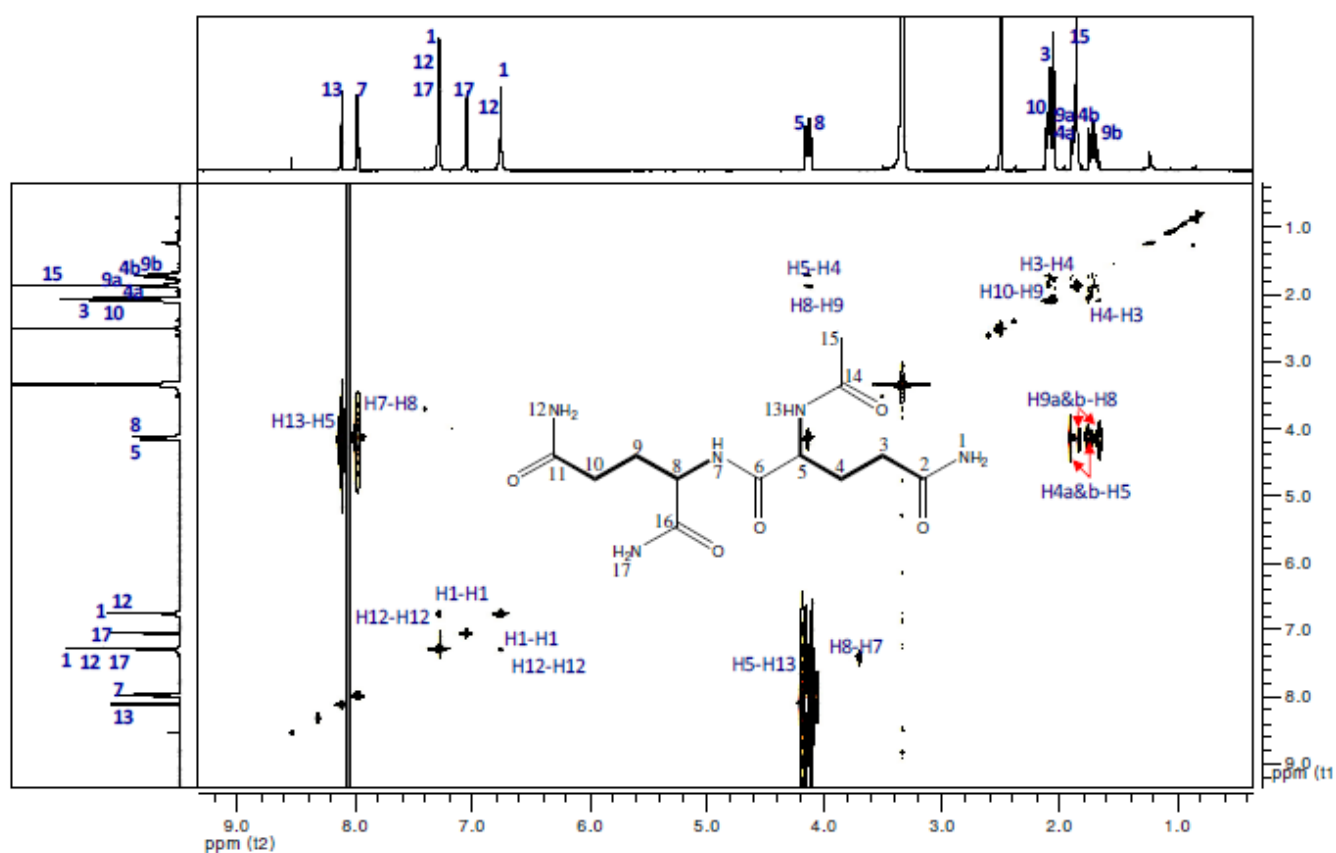

**Figure S6.**  $^1\text{H}$ - $^1\text{H}$  COSY spectrum of compound (**1**) (600 MHz,  $\text{DMSO-}d_6$ )

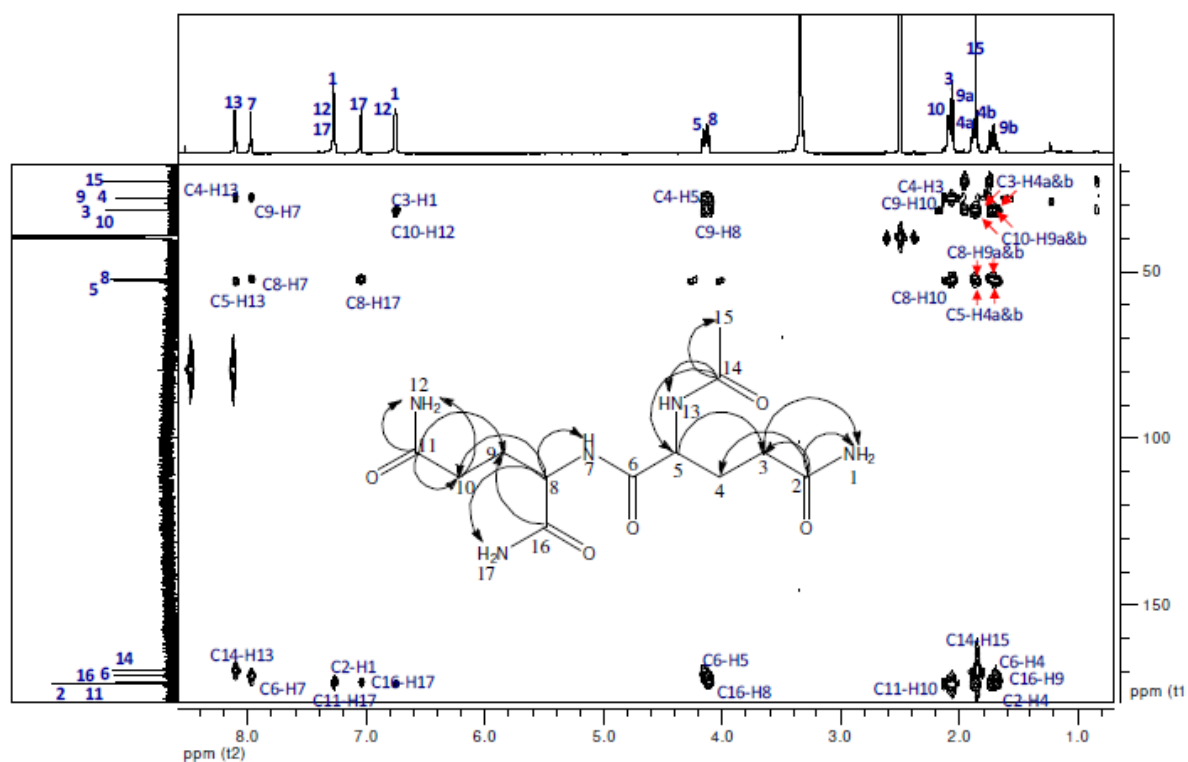

**Figure S7.**  $^1\text{H}$ - $^{13}\text{C}$  HMBC spectrum of compound (**1**) (600 MHz,  $\text{DMSO}-d_6$ )

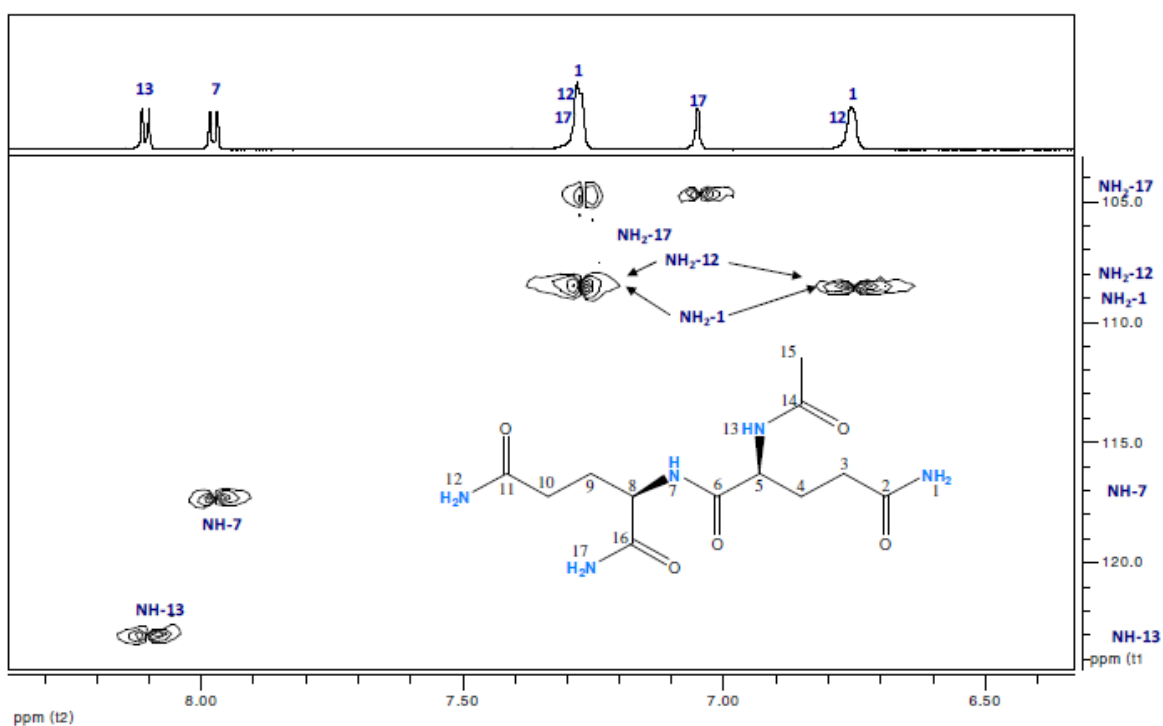

**Figure S8.**  $^1\text{H}$ - $^{15}\text{N}$  HSQC spectrum of compound (**1**) (600 MHz,  $\text{DMSO}-d_6$ )



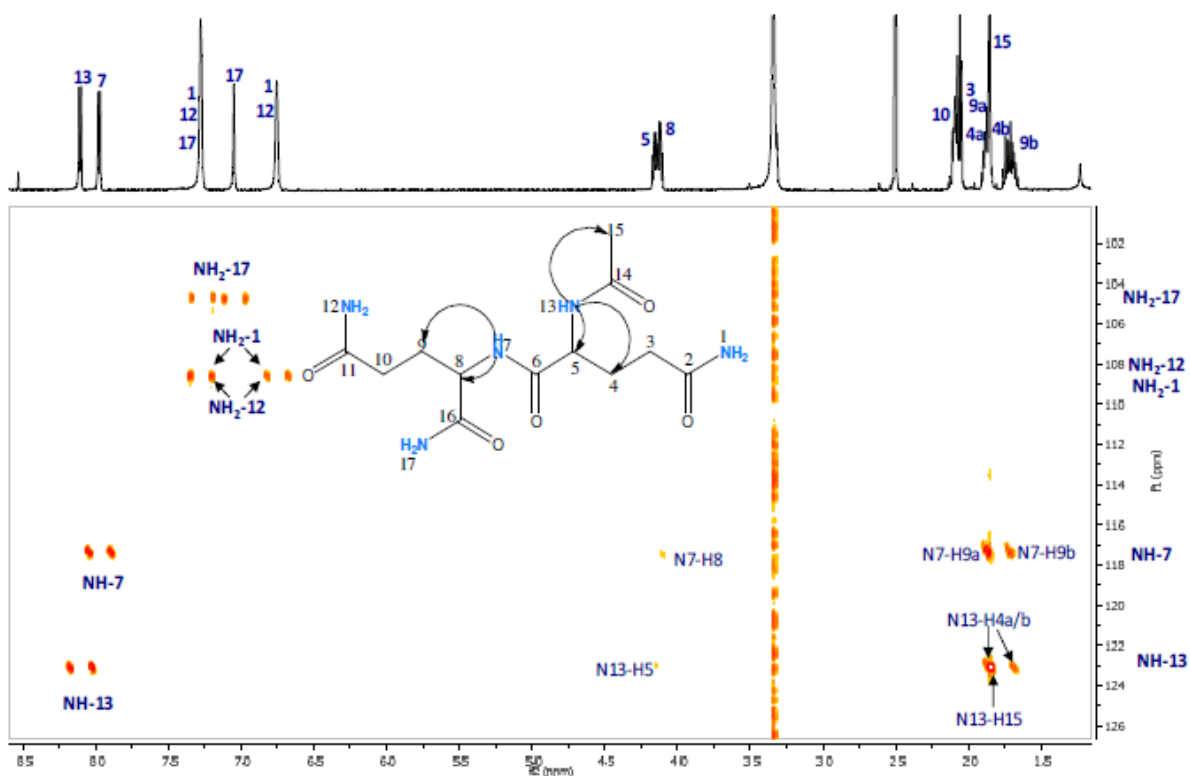

**Figure S9.**  $^1\text{H}$ - $^{15}\text{N}$  HMBC spectrum of compound (**1**) (600 MHz,  $\text{DMSO}-d_6$ )

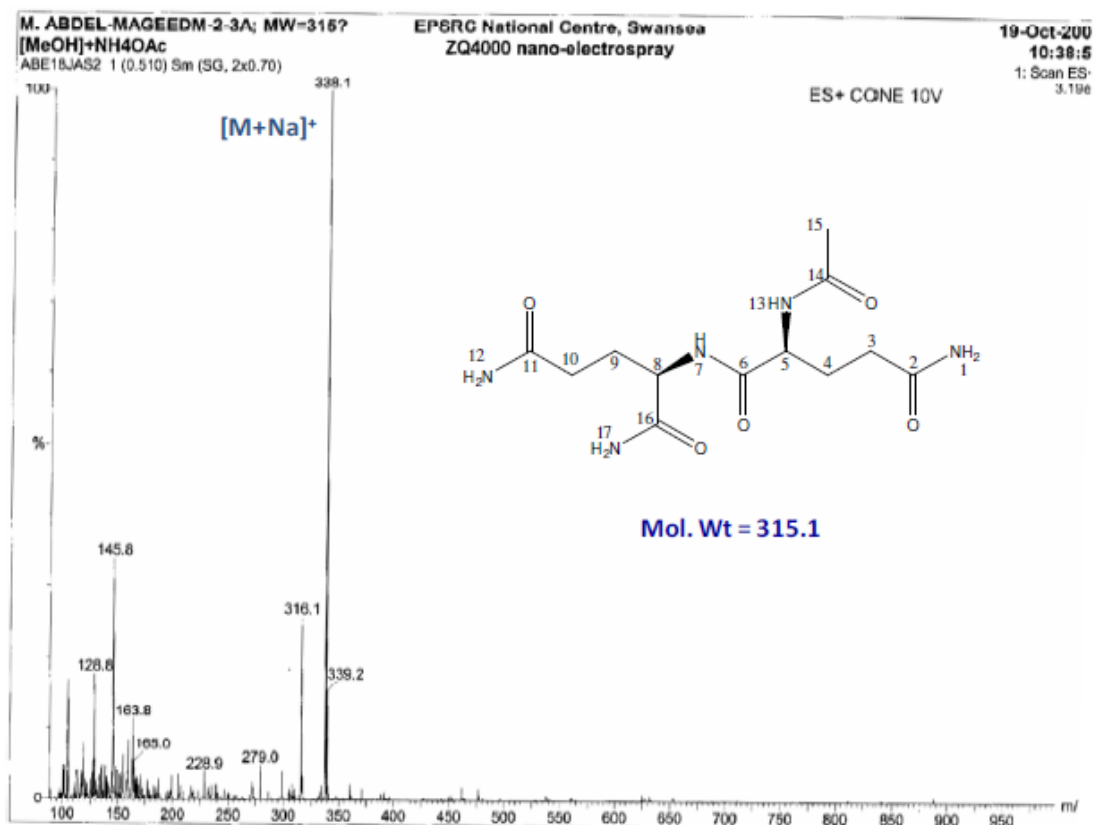

**Figure S10.** LRESIMS spectrum of compound (**1**) (in Methanol)

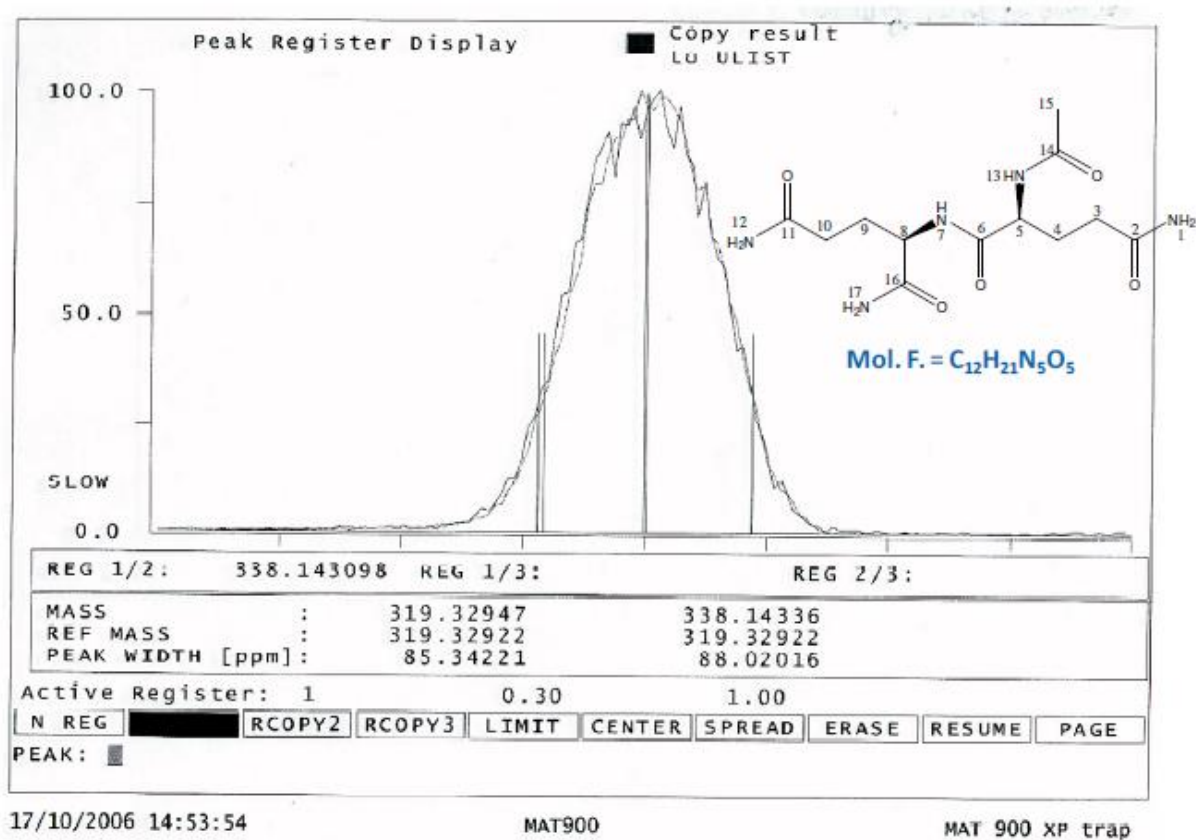

**Figure S11.** HRESIMS spectrum of compound (**1**) (in Methanol)

**TABLE S2.** 1D and 2D NMR data for compound (**2**) obtained at 600 MHz in DMSO-*d*<sub>6</sub>

| No. | <sup>13</sup> C* | <sup>1</sup> H* | <sup>13</sup> C | <sup>1</sup> H | <sup>15</sup> N | <sup>1</sup> H- <sup>1</sup> H COSY | <sup>1</sup> H- <sup>13</sup> C HMBC | HSQC-TOCSY   | 1,1-ADEQUATE | <sup>1</sup> H- <sup>15</sup> N HMBC | <sup>13</sup> C** | <sup>1</sup> H** |
|-----|------------------|-----------------|-----------------|----------------|-----------------|-------------------------------------|--------------------------------------|--------------|--------------|--------------------------------------|-------------------|------------------|
| 1   | -                | -               | -               | -              | 31.4, t         | -                                   | -                                    | -            | -            | H-3                                  | -                 | -                |
| 2   | 42.0, t          | 2.83 (t, 8.0)   | 41.4, t         | 2.76 (t, 8.0)  |                 | H-3                                 | H-3, H-4                             | H-3,4,5,6    | H-3          |                                      | 42.0, t           | 2.98 (t, 7.6)    |
| 3   | 28.9, t          | 1.50 (m)        | 29.2, t         | 1.51 (m)       |                 | H-2, H-4                            | H-2, H-4, H-5                        | -            | H-2, H-4     |                                      | 29.0, t           | 1.65 (m)         |
| 4   | 25.3, t          | 1.35 (m)        | 25.4, t         | 1.38 (m)       |                 | H-3, H-5                            | H-2, H-6                             | H-3,4,5,6    | H-3, H-5     |                                      | 25.3, t           | 1.48 (m)         |
| 5   | 27.9, t          | 1.50 (m)        | 28.3, t         | 1.51 (m)       |                 | H-4, H-6                            | H-4, H-5                             | H-3,4,5,6    | H-4, H-6     |                                      | 28.0, t           | 1.65 (m)         |
| 6   | 50.3, t          | 3.45 (m)        | 49.3, t         | 3.46 (m)       |                 | H-5                                 | H-5                                  | H-3,4,5,6    | H-5          |                                      | 50.4, t           | 3.60 (m)         |
| 7   | -                | -               | -               | 9.68 (brs)     | 174.4, s        | -                                   | -                                    | -            | -            | H-5                                  | -                 | -                |
| 8   | 176.4, s         | -               | 173.9, s        | -              |                 | -                                   | H-10                                 | -            | -            |                                      | 176.5, s          | -                |
| 9   | 30.1, t          | 2.64 (t, 8.0)   | 30.1, t         | 2.58 (m)       |                 | H-10                                | H-10                                 | H-10         | H-10         |                                      | 30.3, t           | 2.80 (m)         |
| 10  | 33.0, t          | 2.33 (t, 8.0)   | 31.3, t         | 2.27 (m)       |                 | H-9                                 | H-9                                  | H-9          | H-9          |                                      | 33.1, t           | 2.50 (m)         |
| 11  | 177.2, s         | -               | 173.9, s        | -              | 116.2, d        | -                                   | H-9, H-13                            | -            | -            |                                      | 177.5, s          | -                |
| 12  | -                | -               | -               | 7.79 (brs)     |                 | H-13                                | -                                    | -            | -            | H-13, H-14                           | -                 | -                |
| 13  | 41.8, t          | 3.01 (t, 8.0)   | 41.0, t         | 3.00 (q, 8.0)  |                 | NH-12, H-14                         | H-14                                 | H-12 to H-17 | H-14         |                                      | 41.9, t           | 3.16 (m)         |
| 14  | 30.5, t          | 1.35 (m)        | 31.4, t         | 1.38 (m)       |                 | H-13, H-15                          | H-13                                 | H-12 to H-17 | H-13, H-15   |                                      | 30.4, t           | 1.50 (m)         |
| 15  | 25.7, t          | 1.35 (m)        | 26.0, t         | 1.26 (m)       |                 | H-14, H-16                          | H-13, H-17                           | H-12 to H-17 | H-14, H-16   |                                      | 25.7, t           | 1.30 (m)         |
| 16  | 28.1, t          | 1.50 (m)        | 28.6, t         | 1.51 (m)       |                 | H-15, H-17                          | H-14                                 | H-12 to H-17 | H-15, H-17   |                                      | 28.0, t           | 1.65 (m)         |
| 17  | 50.3, t          | 3.45 (m)        | 49.4, t         | 3.46 (m)       | 174.4, s        | H-16                                | H-16                                 | H-12 to H-17 | H-16         |                                      | 50.4, t           | 3.62 (m)         |
| 18  | -                | -               | -               | 9.67 (brs)     |                 | -                                   | -                                    | -            | -            | H-16                                 | -                 | -                |
| 19  | 176.4, s         | -               | 173.9, s        | -              |                 | -                                   | H-21                                 | -            | -            |                                      | 176.6, s          | -                |
| 20  | 30.3, t          | 2.64 (t, 8.0)   | 30.1, t         | 2.58 (m)       |                 | H-21                                | H-21                                 | H-21         | H-21         |                                      | 30.3, t           | 2.80 (m)         |
| 21  | 33.1, t          | 2.33 (t, 8.0)   | 32.4, t         | 2.27 (m)       |                 | H-20                                | H-20                                 | H-20         | H-20         |                                      | 33.1, t           | 2.50 (m)         |
| 22  | 177.4, s         | -               | 173.9, s        | -              |                 | -                                   | H-20, H-24                           | -            | -            |                                      | 177.4, s          | -                |
| 23  | -                | -               | -               | 7.79 (brs)     | 116.2, d        | H-24                                | -                                    | -            | H-24         | H-24, H-25                           | -                 | -                |
| 24  | 39.8, t          | 3.01 (t, 8.0)   | 41.0, t         | 3.00 (q, 8.0)  |                 | NH-23, H-25                         | H-25                                 | H-23 to H-28 | NH-23, H-25  |                                      | 41.9, t           | 3.16 (m)         |
| 25  | 30.5, t          | 1.35 (m)        | 31.4, t         | 1.38 (m)       |                 | H-24, H-26                          | H-24                                 | H-23 to H-28 | H-24, H-26   |                                      | 30.4, t           | 1.50 (m)         |
| 26  | 25.7, t          | 1.35 (m)        | 26.0, t         | 1.26 (m)       |                 | H-25, H-27                          | H-24, H-28                           | H-23 to H-28 | H-25, H-27   |                                      | 25.7, t           | 1.30 (m)         |
| 27  | 28.1, t          | 1.50 (m)        | 28.6, t         | 1.51 (m)       |                 | H-26, H-28                          | H-25                                 | H-23 to H-28 | H-26, H-28   |                                      | 28.0, t           | 1.65 (m)         |
| 28  | 50.5, t          | 3.45 (m)        | 49.6, t         | 3.46 (m)       |                 | H-27                                | H-27                                 | H-23 to H-27 | H-27         |                                      | 50.4, t           | 3.60 (m)         |
| 29  | -                | -               | -               | 9.63 (brs)     | 175.6, s        | -                                   | -                                    | -            | -            | H-31                                 | -                 | -                |
| 30  | 176.3, s         | -               | 173.5, s        | -              |                 | -                                   | H-31                                 | -            | -            |                                      | 176.2, s          | -                |
| 31  | 21.9, q          | 1.97 (s)        | 22.9, q         | 1.96 (s)       |                 | -                                   | -                                    | -            | -            |                                      | 21.9, q           | 2.14 (s)         |

All spectra were recorded at 600 MHz in DMSO-*d*<sub>6</sub> solution, except were noted.

\* Recorded at 600 MHz in D<sub>2</sub>O

\*\* Previously reported data.

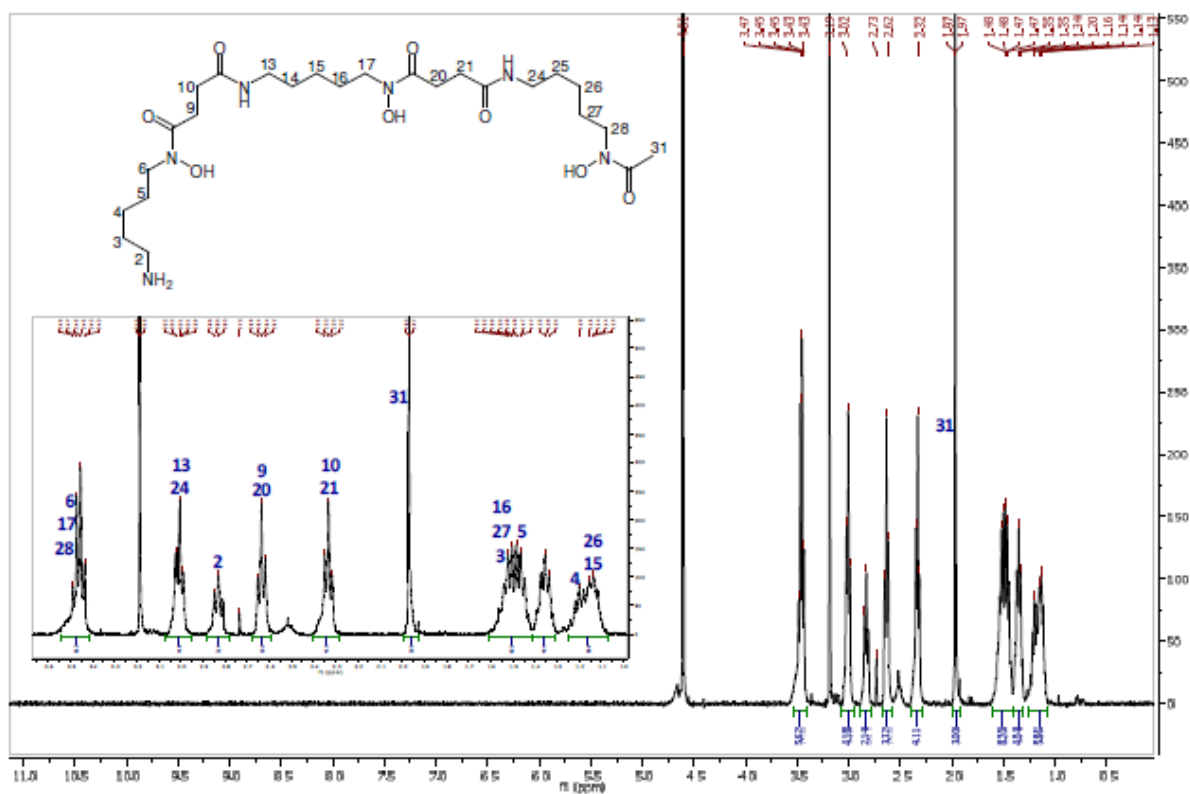

**Figure S12.**  $^1\text{H}$  NMR spectrum of compound (**2**) (600 MHz,  $\text{D}_2\text{O}$ )

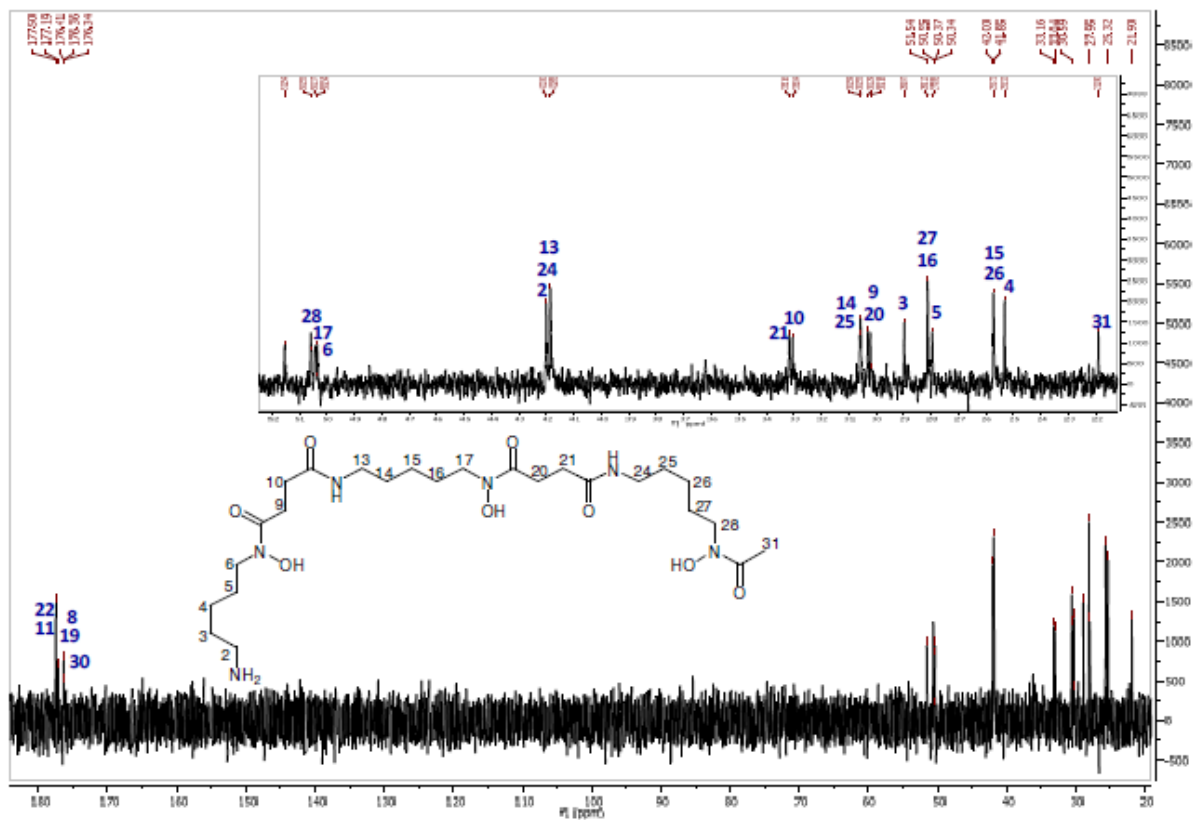

**Figure S13.**  $^{13}\text{C}$  NMR spectrum of compound (**2**) (150 MHz,  $\text{D}_2\text{O}$ )

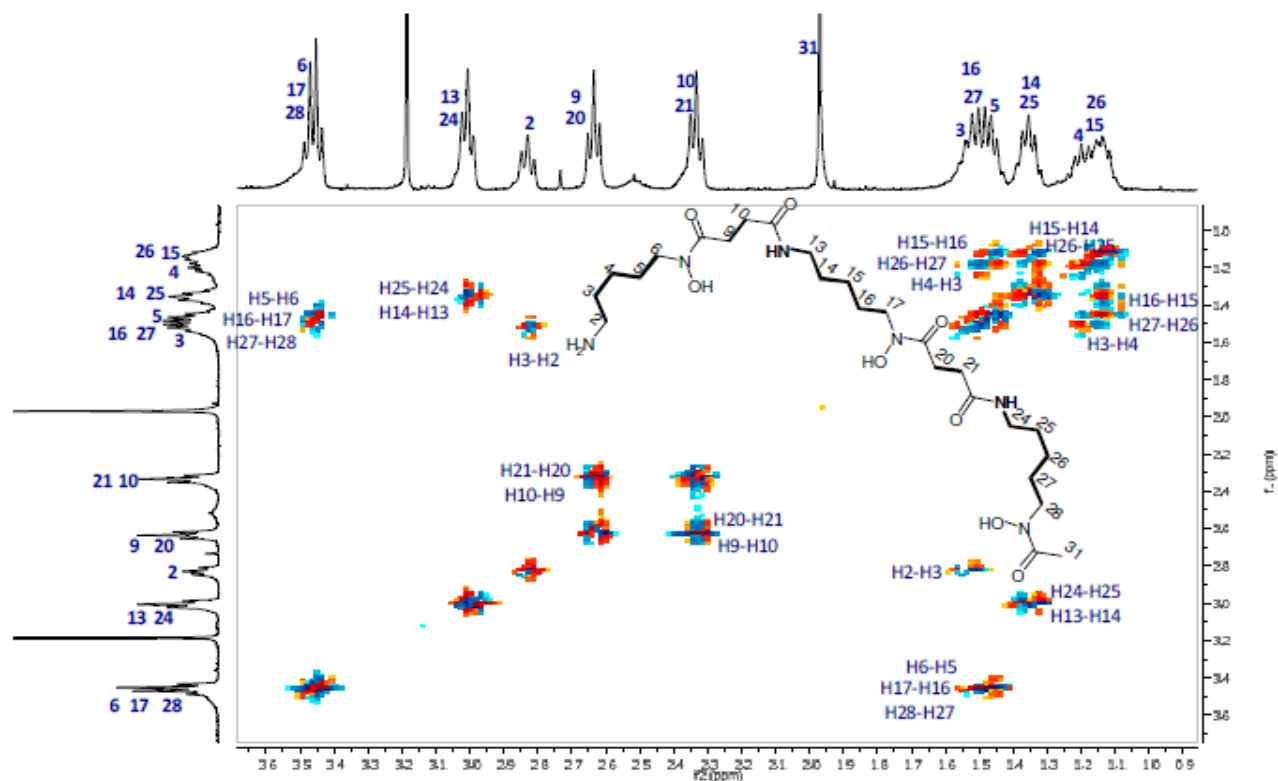

Figure S14.  $^1\text{H}$ - $^1\text{H}$  COSY spectrum of compound (**2**) (600 MHz,  $\text{D}_2\text{O}$ )

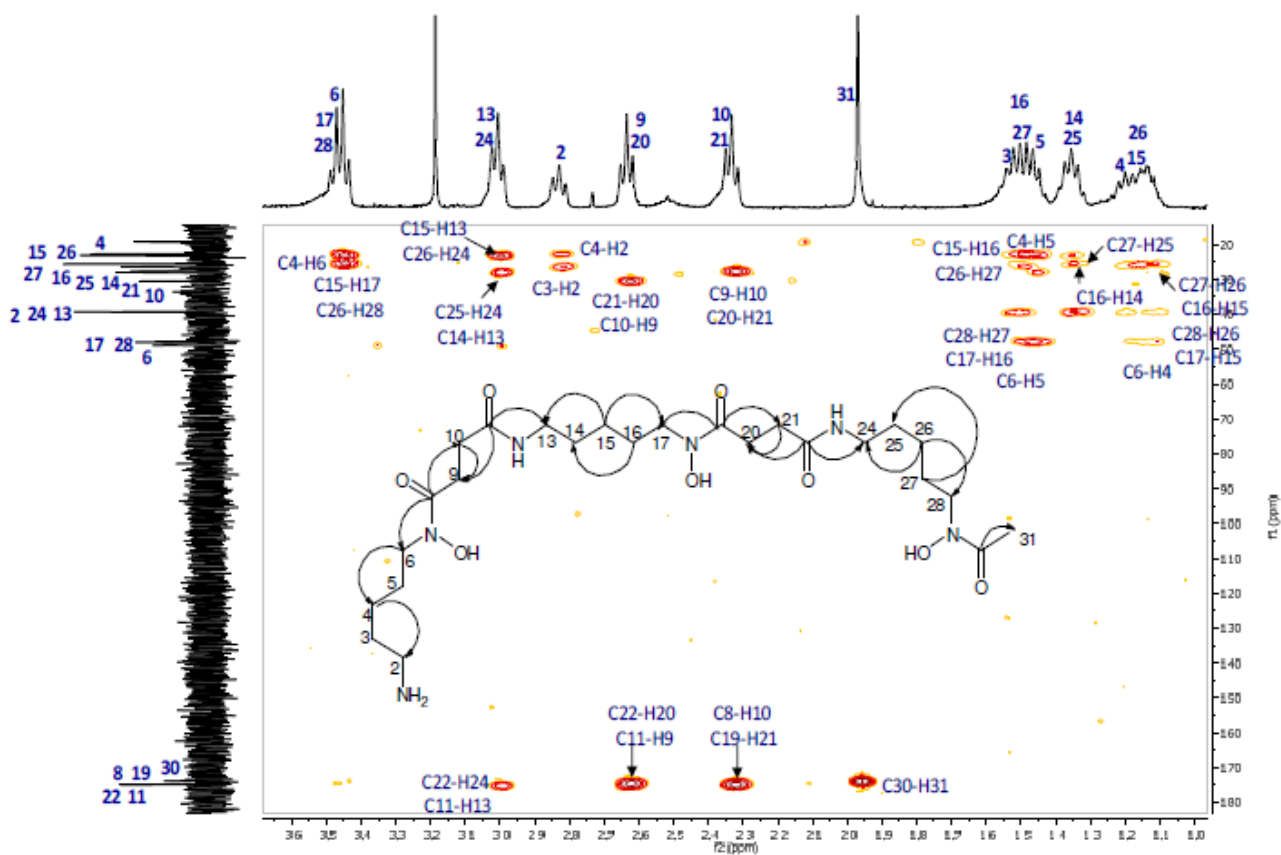

Figure S15.  $^1\text{H}$ - $^{13}\text{C}$  HMBC spectrum of compound (**2**) (600 MHz,  $\text{D}_2\text{O}$ )

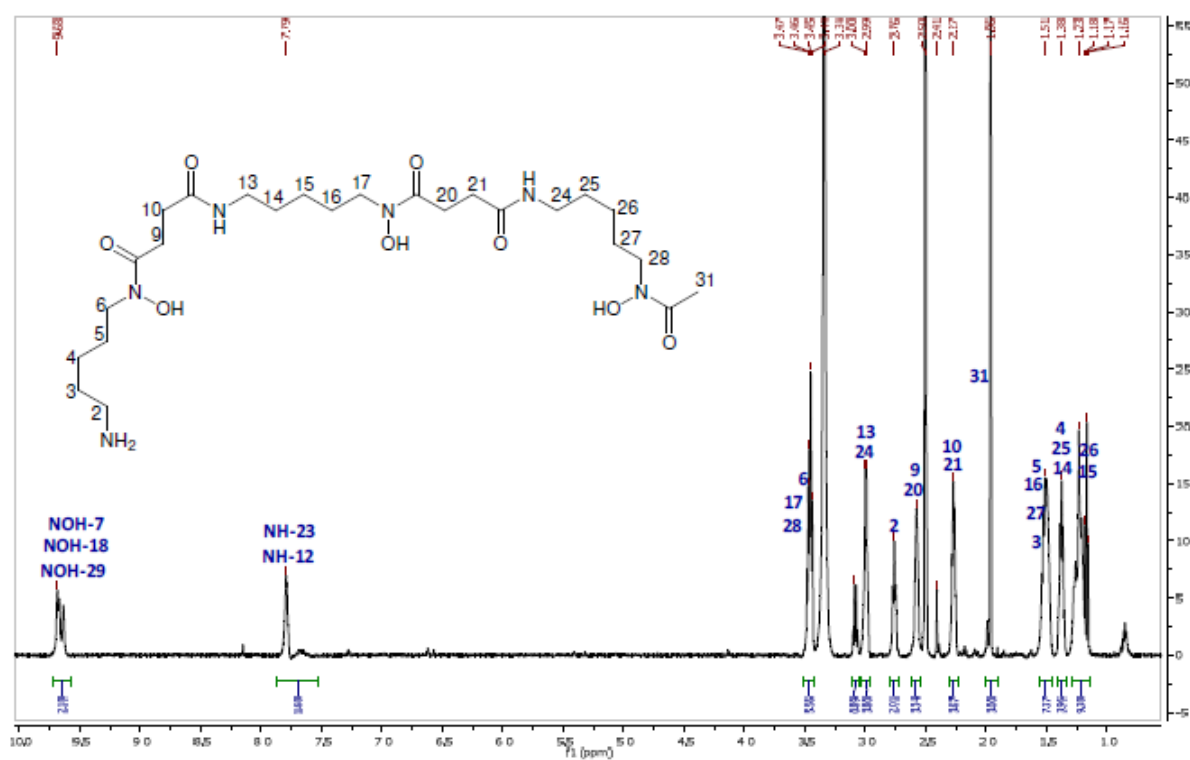

**Figure S16.**  $^1\text{H}$  NMR spectrum of compound (2) (600 MHz,  $\text{DMSO}-d_6$ )

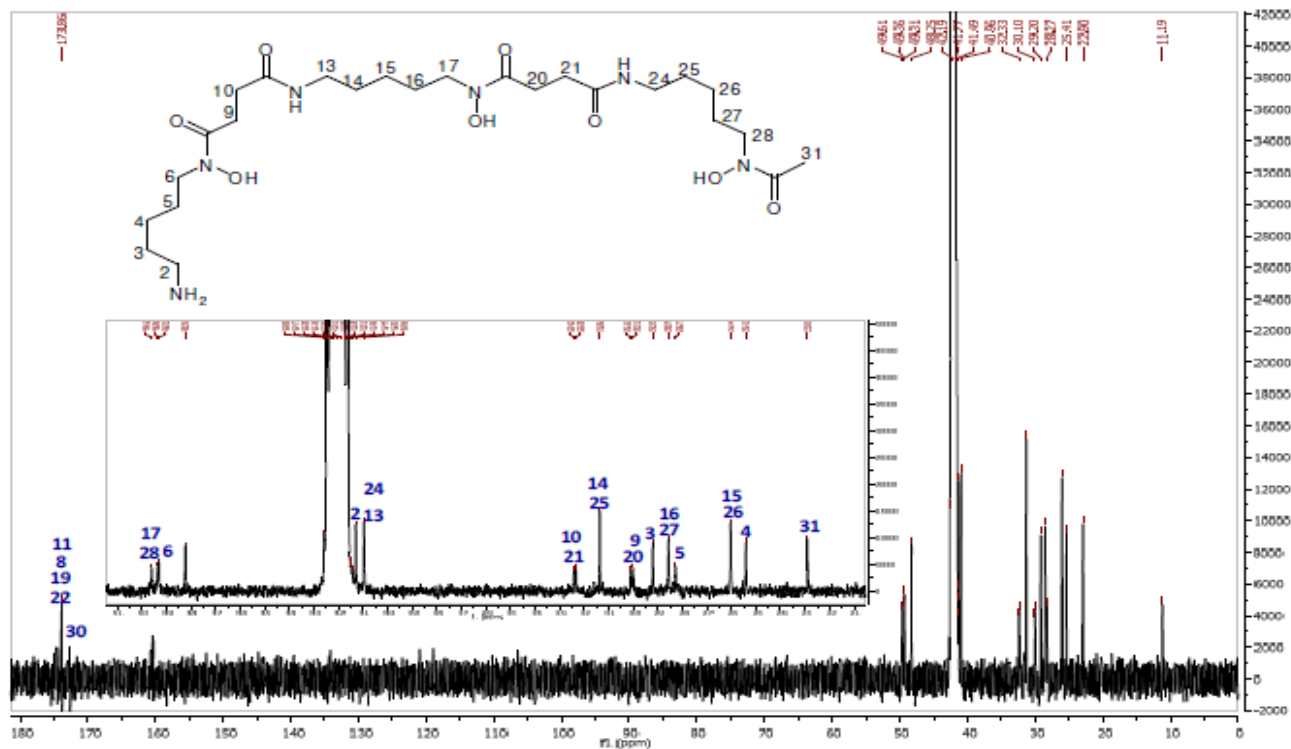

**Figure S17.**  $^{13}\text{C}$  NMR spectrum of compound (2) (150 MHz,  $\text{DMSO}-d_6$ )

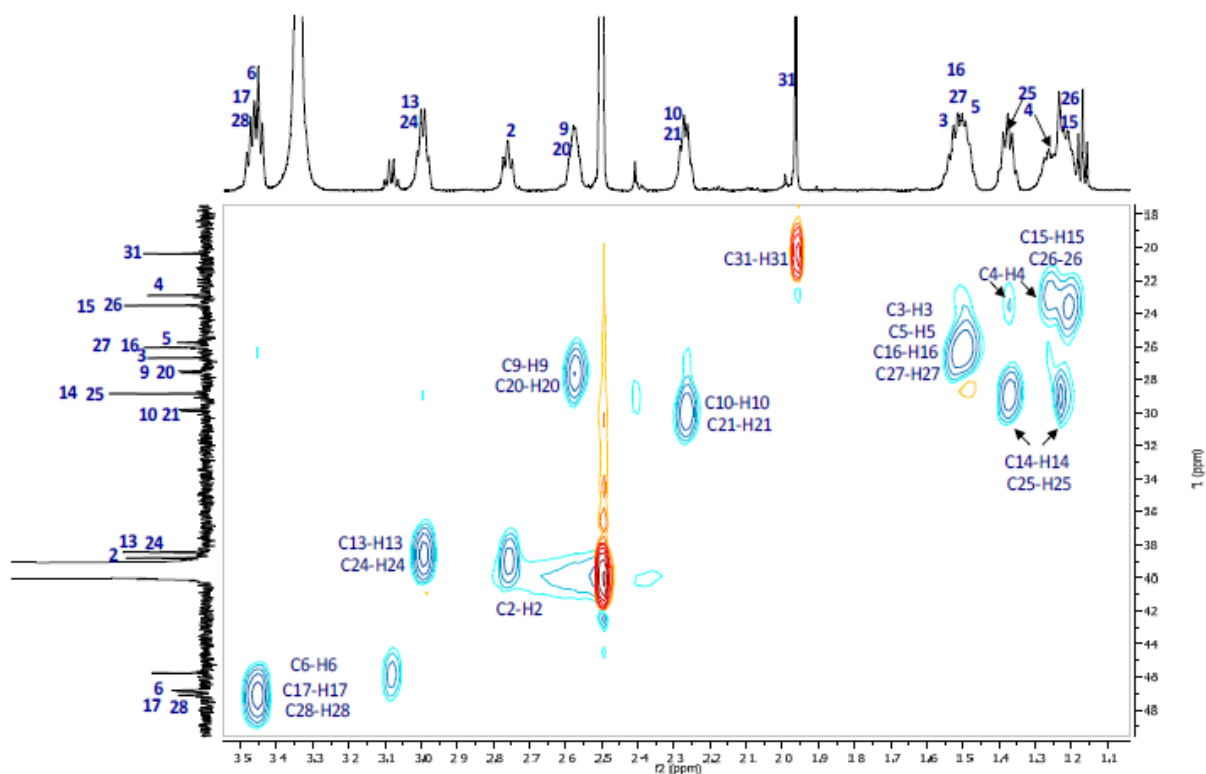

**Figure S18.**  $^1\text{H}$ - $^{13}\text{C}$  HSQC spectrum of compound (**2**) (600 MHz,  $\text{DMSO-}d_6$ )

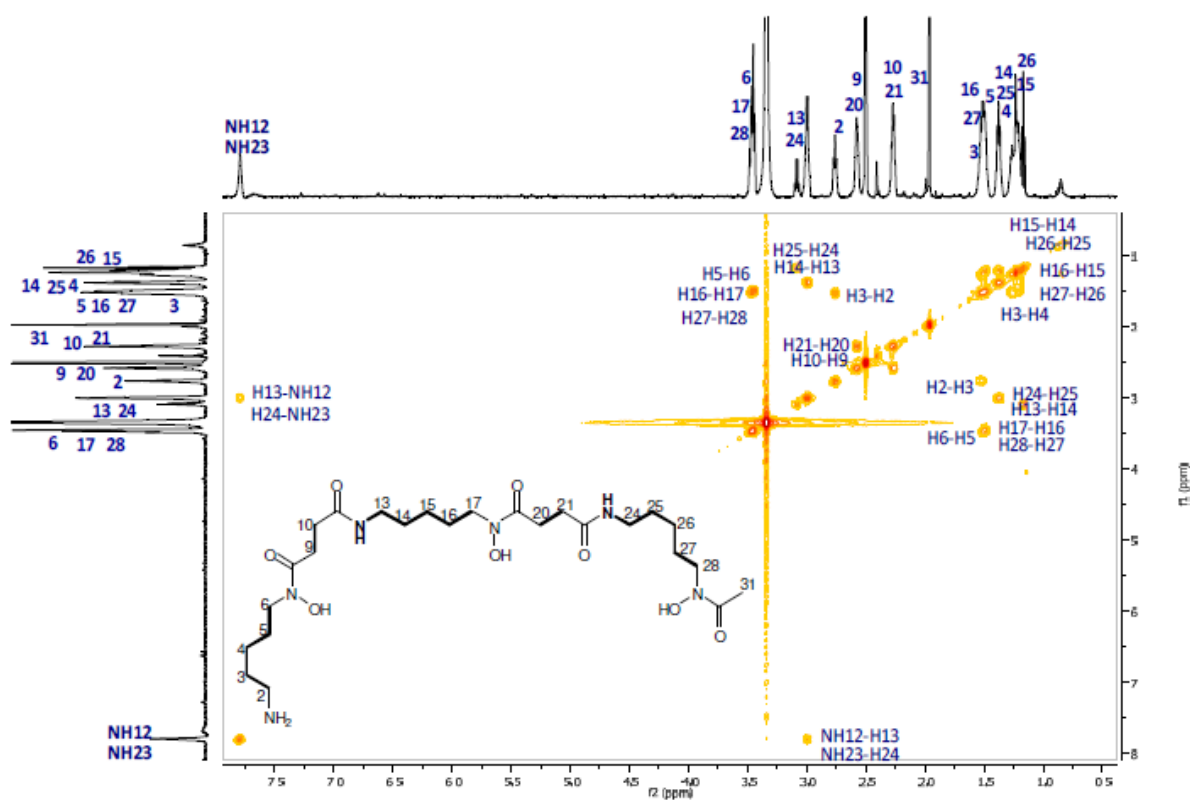

**Figure S19.**  $^1\text{H}$ - $^1\text{H}$  COSY spectrum of compound (**2**) (600 MHz,  $\text{DMSO-}d_6$ )

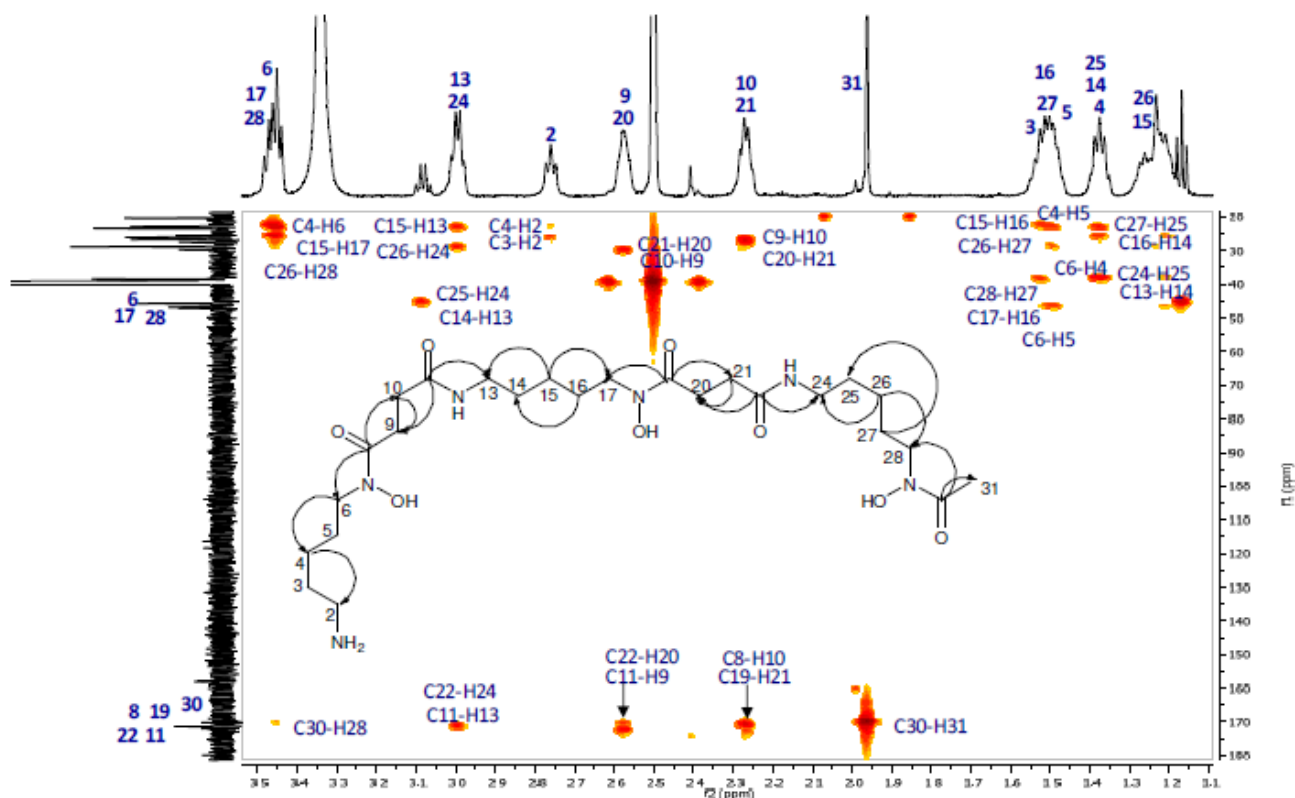

**Figure S20.**  $^1\text{H}$ - $^{13}\text{C}$  HMBC spectrum of compound (**2**) (600 MHz,  $\text{DMSO-}d_6$ )

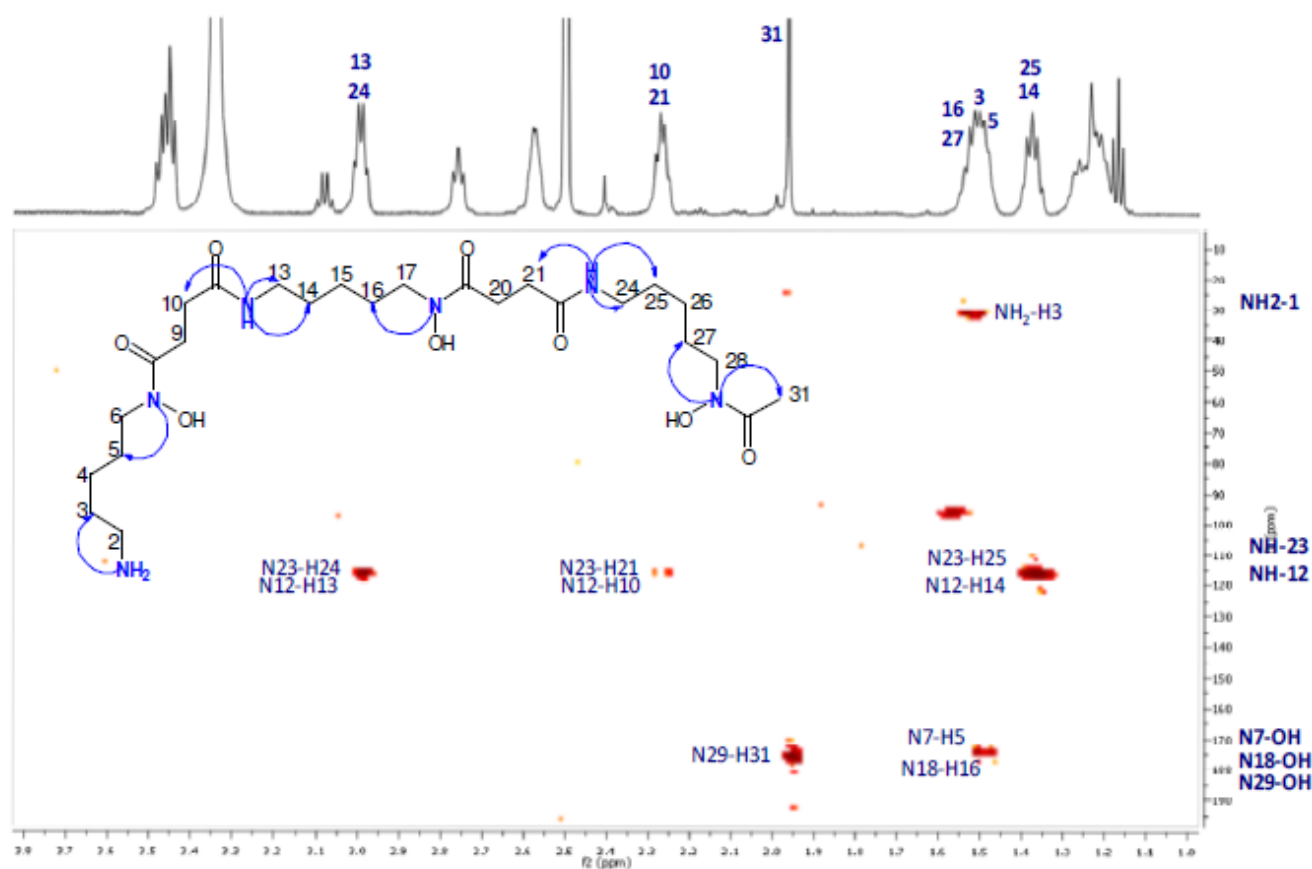

**Figure S21.**  $^1\text{H}$ - $^{15}\text{N}$  HMBC spectrum of compound (**2**) (600 MHz,  $\text{DMSO-}d_6$ )



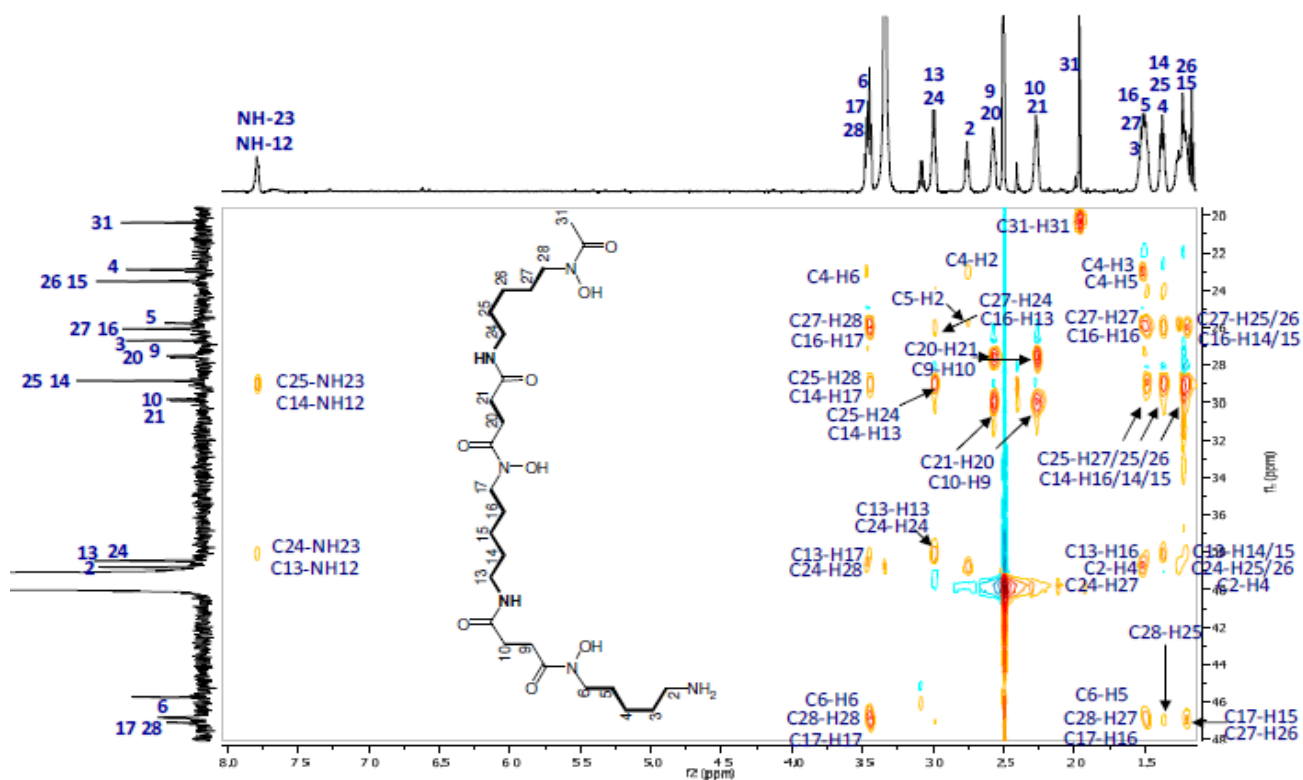

Figure S22. HSQC-TOCSY spectrum of compound (2) (600 MHz, DMSO- $d_6$ )

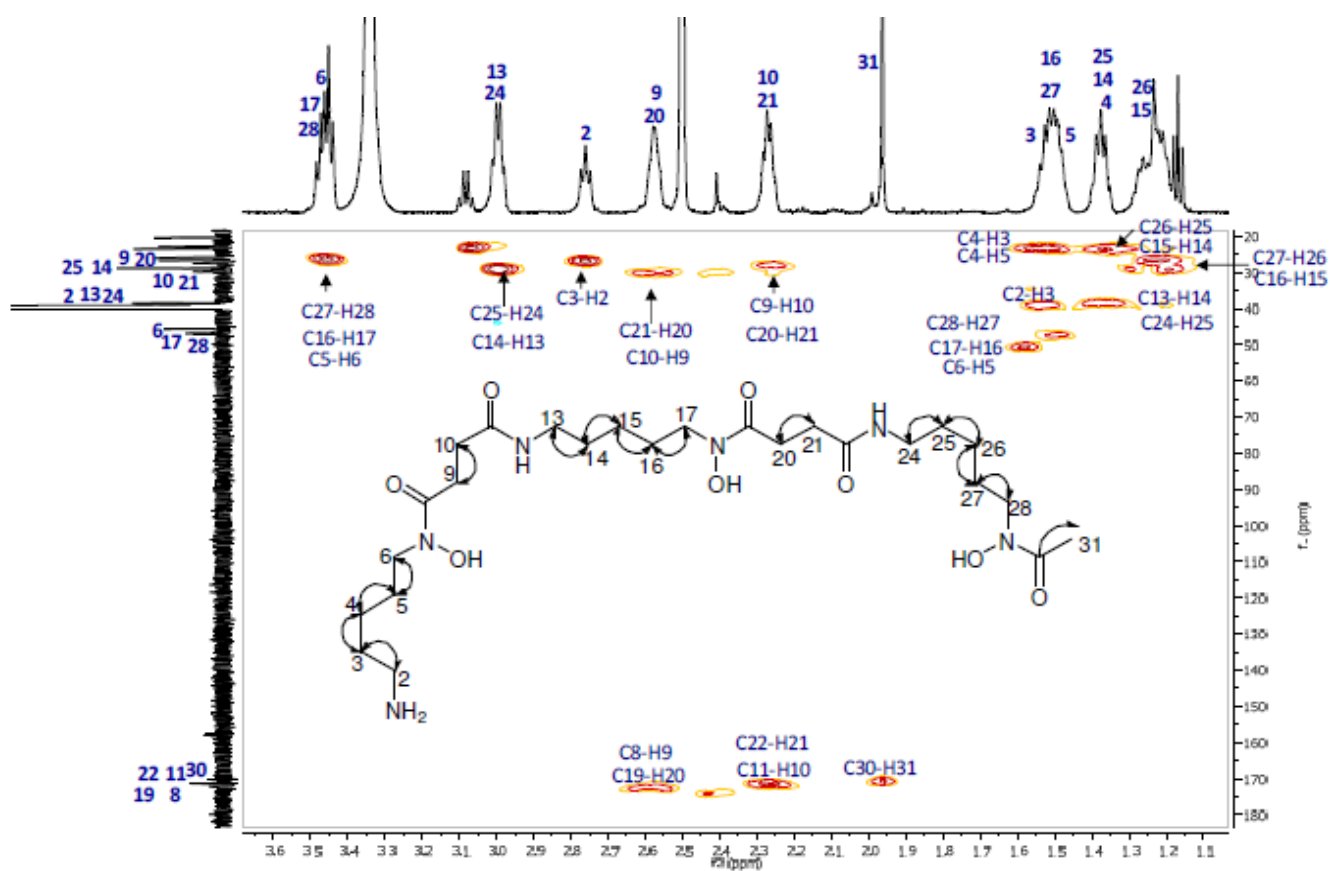

Figure S23. 1,1-ADEQUATE spectrum of compound (2) (600 MHz, DMSO- $d_6$ )

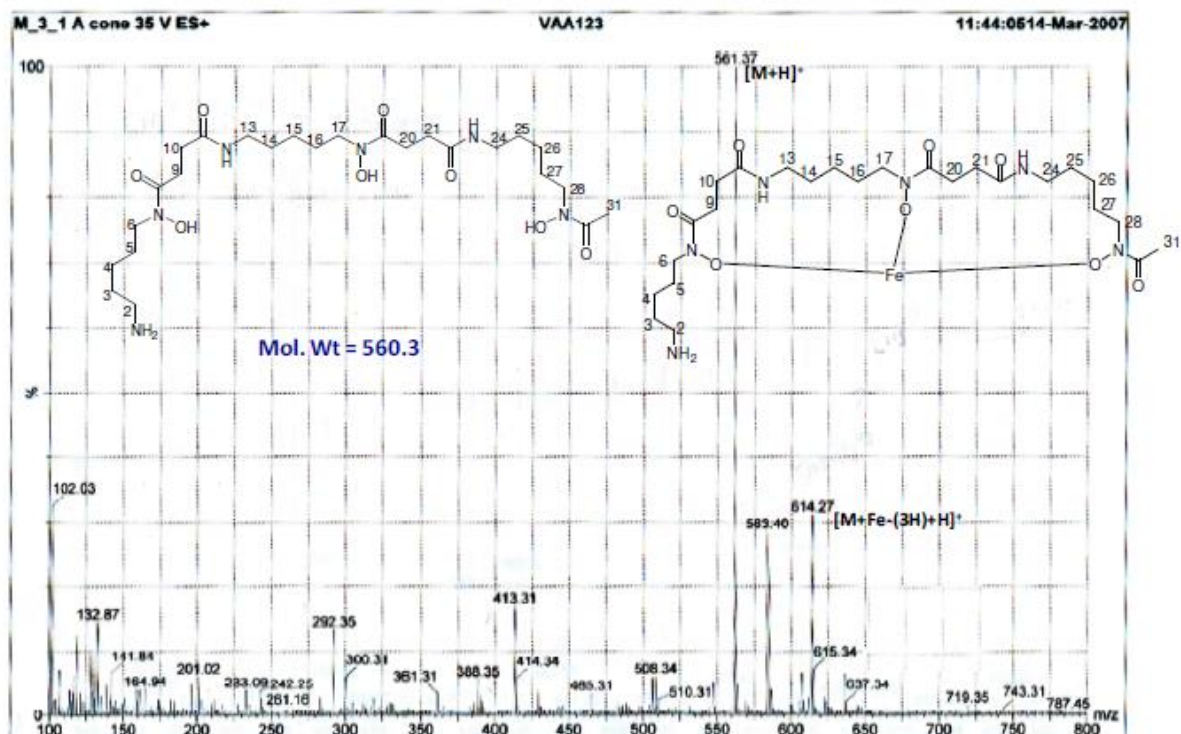

Figure S24. LRESIMS spectrum of compound (2) (in Methanol)

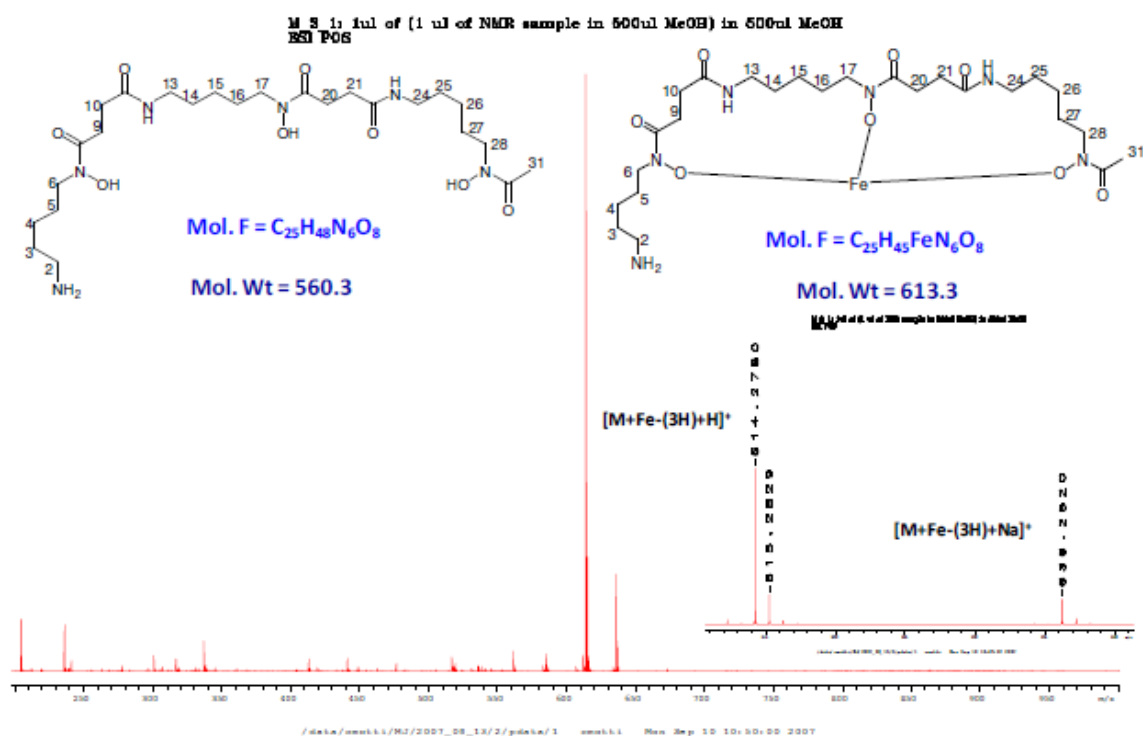

Figure S25. HRESIMS spectrum of compound (2) (in Methanol)

**Table S3.** Some putative stress response genes identified in the genome of *M. provectaris* MT25<sup>T</sup>.

| Stress response                      | Protein                                                         | Gene             | GenBank ID   |
|--------------------------------------|-----------------------------------------------------------------|------------------|--------------|
| <b>Cold Shock</b>                    | Cold-shock protein                                              | -                | WP_026267952 |
|                                      | Chaperonin GroEL                                                | <i>groL</i>      | WP_018787968 |
|                                      | ATP-dependent chaperone ClpB                                    | <i>clpB</i>      | WP_128137179 |
|                                      | Co-chaperone GroES                                              | <i>groES</i>     | WP_128138515 |
|                                      | DEAD/DEAH box helicase family protein                           | <i>deaD</i>      | WP_181726494 |
|                                      | Molecular chaperone HtpG                                        | <i>htpG</i>      | WP_128137853 |
|                                      | Fe-S protein assembly chaperone HscB                            | <i>hscB</i>      | WP_128138402 |
| <b>Osmotic stress</b>                | Glycine/betaine ABC transporter substrate-binding protein       | <i>opuA</i>      | WP_128138443 |
|                                      | Osmoprotectant NAGGN system M42 family peptidase                | <i>ngg, asnO</i> | WP_128138800 |
|                                      | Thiol reductant ABC exporter subunit CydD                       | <i>cydD</i>      | WP_128139285 |
|                                      | Malate dehydrogenase                                            | <i>mdh</i>       | WP_120573187 |
|                                      | Aspartate-semialdehyde dehydrogenase                            | <i>asd</i>       | WP_128137833 |
|                                      | Protein translocase subunit SecF                                | <i>secF</i>      | WP_128139096 |
|                                      | Protein translocase subunit SecD                                | <i>secD</i>      | WP_128139095 |
|                                      | Preprotein translocase subunit SecE                             | <i>secE</i>      | WP_013287463 |
|                                      | ABC transporter permease                                        | -                | WP_128136052 |
|                                      | Amino acid ABC transporter permease                             | -                | WP_128138145 |
|                                      | Branched-chain amino acid ABC transporter permease              | -                | WP_128137320 |
| <b>Membrane/cell wall alteration</b> | beta-ketoacyl-ACP synthase II                                   | <i>fabF</i>      | WP_091421371 |
|                                      | 3-oxoacyl-ACP reductase                                         | <i>fabG</i>      | WP_128138315 |
|                                      | enoyl-ACP reductase                                             | <i>fabI</i>      | WP_128138316 |
|                                      | Ketoacyl-ACP synthase III                                       | <i>fabH</i>      | WP_120568620 |
|                                      | Long-chain fatty acid--CoA ligase                               | -                | WP_128137452 |
|                                      | Phytoene/squalene synthase family protein                       | -                | WP_118912784 |
|                                      | Acyl-CoA desaturase                                             | -                | WP_128136684 |
|                                      | Acyl-CoA dehydrogenase family protein                           | -                | WP_128138936 |
| <b>Respiration</b>                   | Cytochrome <i>d</i> ubiquinol oxidase subunit II                | <i>cydB</i>      | WP_128136880 |
|                                      | Cytochrome <i>c</i> oxidase subunit I                           | <i>ctad</i>      | WP_128137613 |
|                                      | Cytochrome <i>c</i> oxidase subunit II                          | <i>coxB</i>      | WP_128137061 |
|                                      | Cytochrome <i>c</i> oxidase assembly protein                    | -                | WP_128137058 |
| <b>Respiratory-related</b>           | Arsenate reductase                                              | <i>arsC</i>      | WP_128136248 |
|                                      | Ferredoxin reductase                                            | -                | WP_128138569 |
|                                      | NADH-quinone oxidoreductase                                     | <i>nuoE</i>      | WP_128138194 |
|                                      | Succinate dehydrogenase/fumarate reductase iron-sulfur subunit  | -                | WP_128137281 |
|                                      | Fumarate reductase/succinate dehydrogenase flavoprotein subunit | -                | WP_128137282 |
| <b>Oxidative stress</b>              | Superoxide dismutase                                            | <i>sodN</i>      | WP_128138300 |
|                                      | Catalase                                                        | -                | WP_128139097 |
|                                      | Thioredoxin                                                     | <i>trxA</i>      | WP_128137174 |
|                                      | Thioredoxin-disulfide reductase                                 | <i>trxB</i>      | WP_128136870 |
|                                      | Peroxiredoxin                                                   | -                | WP_128138778 |
|                                      | Arsenate reductase                                              | <i>arsC</i>      | WP_128136248 |
|                                      | Glutaredoxin family protein                                     | -                | WP_013288752 |
|                                      | NAD(P)H-quinone oxidoreductase                                  | -                | WP_128136140 |
| <b>Carbon starvation</b>             | Glycogen synthase                                               | <i>glgA</i>      | WP_181726498 |
|                                      | Glycogen debranching enzyme                                     | <i>glgX</i>      | WP_128138327 |
|                                      | Carbonic anhydrase                                              | -                | WP_128138025 |
|                                      | Carbon-nitrogen hydrolase family                                | -                | WP_128136924 |
